# Supplementary material
Source: MDPI journal article supplement (https://www.mdpi.com/2073-4433/13/1/25)
Supplement: s1 [file s1]

# Arctic Stratosphere Circulation Changes in 21st Century in Simulations of INM CM5

Pavel N. Vargin, Sergey V. Kostykin, Evgeni M. Volodin, Alexander I. Pogoreltsev and Ke Wei

S1. Three-dimensional Plumb flux vectors were calculated according to [35]:

$$F = (F_x, F_y, F_z) = \frac{p}{p_s} \cos y \cdot \begin{pmatrix} V^{*2} - \frac{1}{2\Omega a \cdot \sin 2y} \frac{\partial(V^* \Phi^*)}{\partial x} \\ -U^* V^* + \frac{1}{2\Omega a \cdot \sin 2y} \frac{\partial(U^* \Phi^*)}{\partial x} \\ \frac{2\Omega \cdot \sin y}{S} \left[ V^* T^* - \frac{1}{2\Omega a \cdot \sin 2y} \frac{\partial}{\partial x} (T^* \Phi^*) \right] \end{pmatrix} \quad (1)$$

where  $F_x$ ,  $F_y$ ,  $F_z$  are the longitudinal, latitudinal and vertical components of the Plumb flux vector, with  $x$  – longitude,  $y$  – latitude,  $z$  – altitude,  $U$ ,  $V$  are zonal and meridional velocity,  $\Phi$  is geopotential,  $T$  – temperature,  $p$  – pressure, and  $p_s$  – pressure at Earth surface,  $a$  stands for Earth's radius,  $\Omega$  for Earth's angular velocity, with  $S = \frac{\partial \bar{T}}{\partial z} + \frac{\kappa \bar{T}}{H}$  is static stability,  $\kappa = R/c_p \approx 0.286$  and  $H$  represents scale height; a star indicates the deviation from the zonal average and a bar the zonal mean.

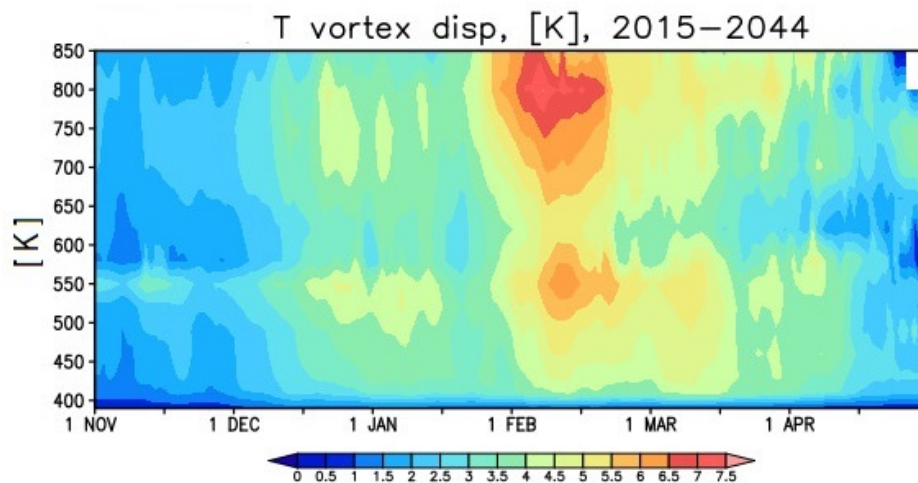

a

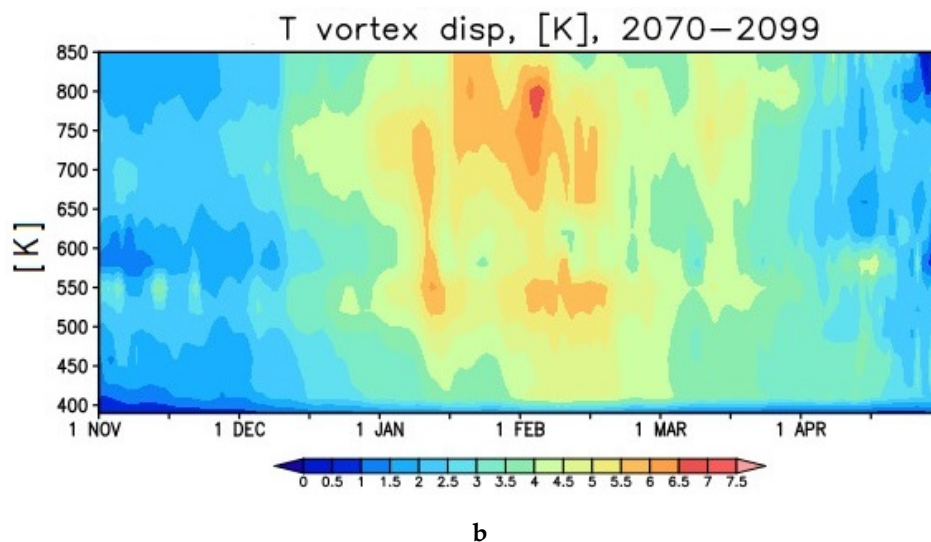

**Figure S2.** Seasonal cycle of dispersion of daily average mean air temperature (K) inside Arctic stratospheric polar vortex in experiment SSP5-8.5: for the period 2015-2044 (a), for the period 2070-2099 (b).

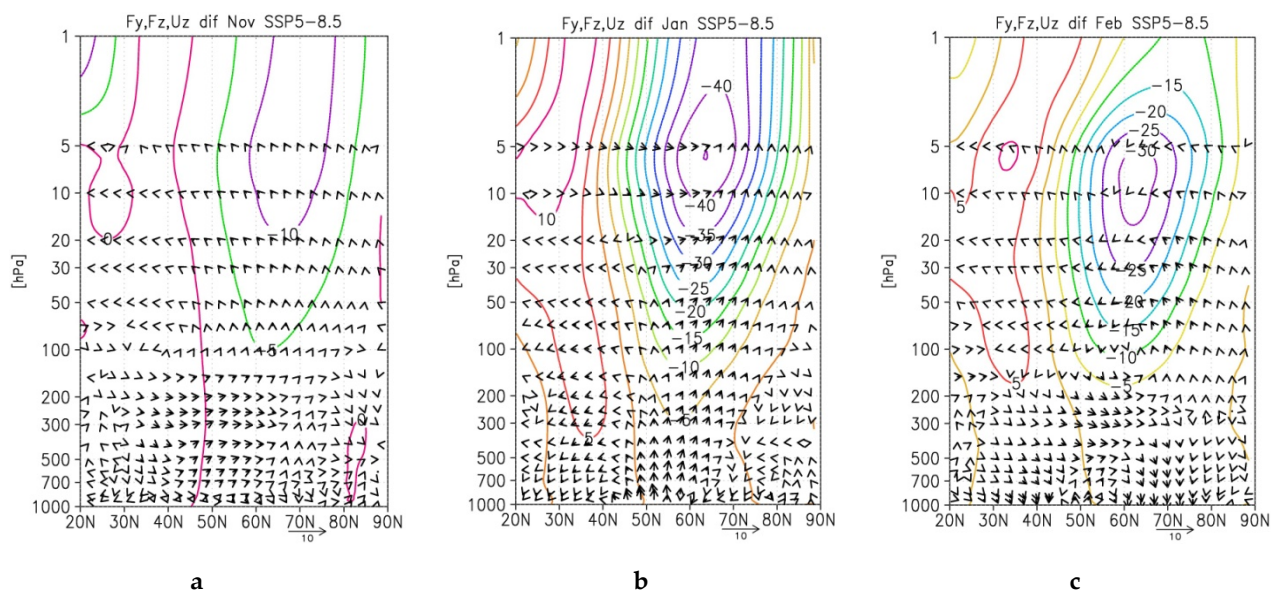

**Figure S3.** Altitude-latitude cross section of Plumb vectors  $F_y$ ,  $F_z$  ( $\text{m}^2/\text{s}^2$ ) and zonal mean zonal wind difference between "warm" and "cold" winters in November (a), January (b), and February (c).

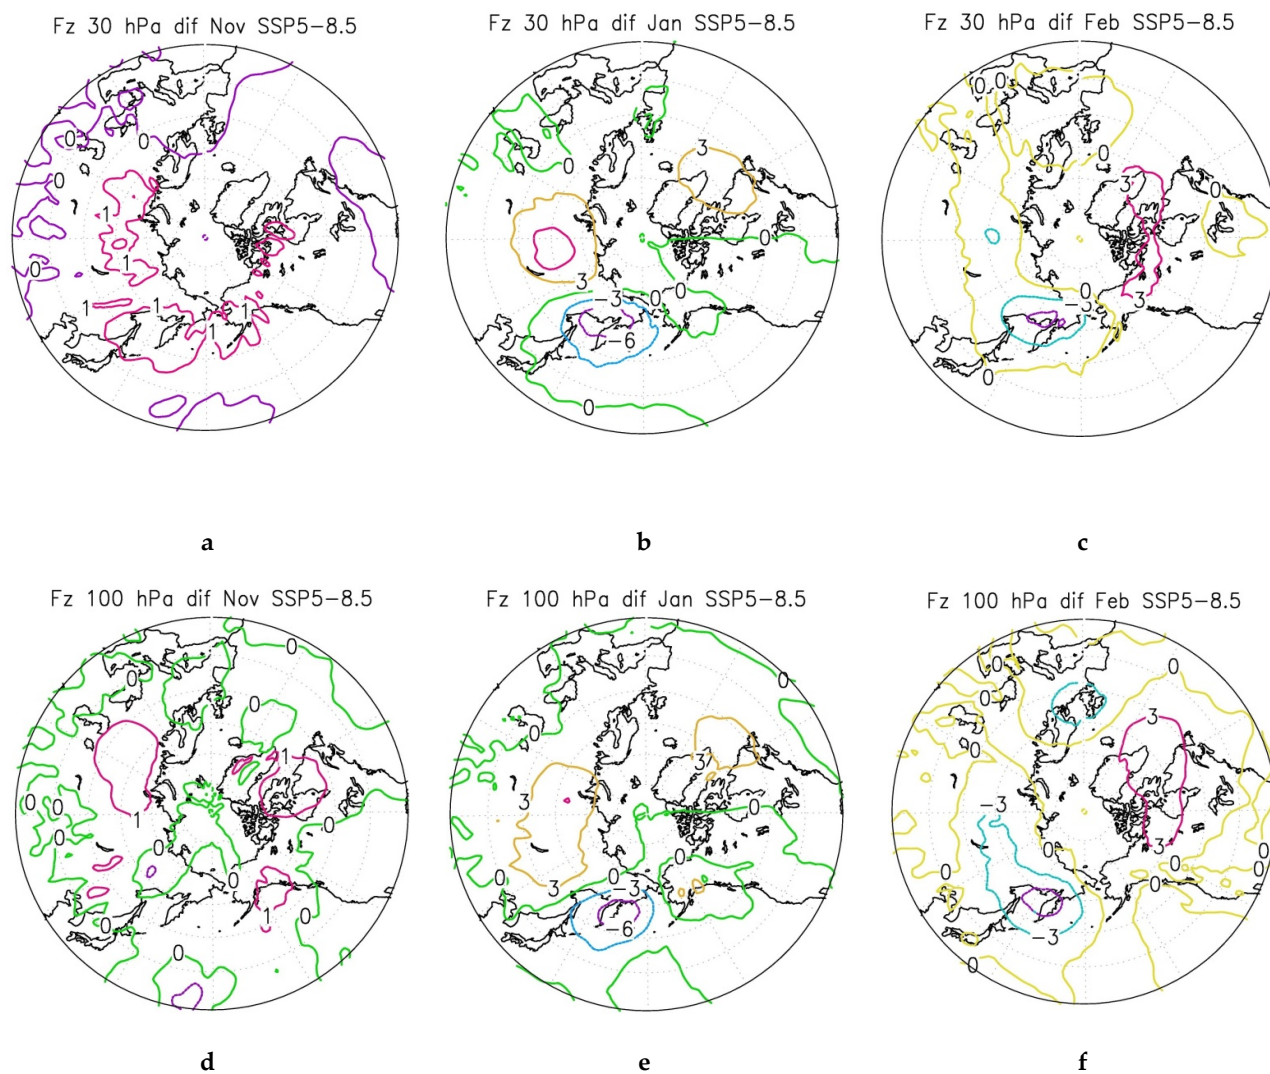

**Figure S4.** Vertical component of Plumb vectors  $F_z$  ( $\text{m}^2/\text{s}^2$ ) difference between "warm" and "cold" winters at pressure level 30 hPa and 100 hPa in November (a,d), January (b,e), and February (c,f) respectively. Contour intervals are 1 for November and 3 for January and February. .
